# Supplementary material
Source: publisher site journal article supplement (https://www.dovepress.com/article/367443)
Supplement: Supplementary file 1 [file get_supplementary_file.php]

**Supplementary Table S1** Binary logistic regression analysis for odds of undergoing at least one disease-specific diagnostic procedure for POAG during the 1-year post-index period

| **Variable** | **Parameter Estimate** | **SE** | **OR** | **95% CI** | | **Wald  Chi-square** | **P-value** |
| --- | --- | --- | --- | --- | --- | --- | --- |
| **Lower Limit** | **Upper Limit** |
| Cohort a (ref. CH1) |  |  |  |  |  |  |  |
| CH2 | 1.707 | 0.039 | 5.510 | 5.104 | 5.949 | 1909.786 | <.0001 |
| CH3 | 2.546 | 0.030 | 12.757 | 12.023 | 13.535 | 7106.141 | <.0001 |
| CH4 | –1.571 | 0.031 | 0.208 | 0.196 | 0.221 | 2623.409 | <.0001 |
| Female (ref. Male) | –0.050 | 0.024 | 0.952 | 0.908 | 0.997 | 4.360 | .0368 |
| Age ≥55 years (ref. <55 years) | 0.366 | 0.038 | 1.440 | 1.338 | 1.554 | 91.860 | <.0001 |
| Region(ref. South) |  |  |  |  |  |  |  |
| Midwest | 0.697 | 0.037 | 2.007 | 1.866 | 2.158 | 353.319 | <.0001 |
| Northeast | 0.681 | 0.040 | 1.975 | 1.826 | 2.137 | 289.422 | <.0001 |
| West | 1.102 | 0.046 | 3.011 | 2.751 | 3.295 | 572.945 | <.0001 |
| Uninsured (ref. other payer type) | –1.097 | 0.214 | 0.334 | 0.219 | 0.508 | 26.195 | <.0001 |
| Index specialty (office visit) (ref. Other) |  |  |  |  |  |  |  |
| Ophthalmologist/Optometry | 0.785 | 0.039 | 2.193 | 2.031 | 2.368 | 402.432 | <.0001 |
| Primary care physicianb | 0.234 | 0.065 | 1.264 | 1.113 | 1.436 | 12.966 | .0003 |
| CCI (ref. 0)c |  |  |  |  |  |  |  |
| 1 | 0.340 | 0.035 | 1.405 | 1.313 | 1.504 | 95.848 | <.0001 |
| 2+ | 0.292 | 0.028 | 1.339 | 1.269 | 1.414 | 110.951 | <.0001 |
| Pre-index comorbidities (ref. none)d | | | | | | | |
| Depression | –0.478 | 0.050 | 0.620 | 0.562 | 0.684 | 90.573 | <.0001 |
| Dyslipidemia | –0.348 | 0.036 | 0.706 | 0.659 | 0.758 | 95.189 | <.0001 |
| CAD/MI | –0.559 | 0.048 | 0.572 | 0.521 | 0.628 | 135.30 | <.0001 |
| Smoking | –0.553 | 0.050 | 0.575 | 0.521 | 0.635 | 121.932 | <.0001 |
| Thyroid disease | –0.390 | 0.043 | 0.677 | 0.622 | 0.737 | 80.659 | <.0001 |

**Notes:** aCH1: patients treated with ≥1 topical antiglaucoma medication only; CH2: patients who underwent ≥1 glaucoma-related procedure only; CH3: patients treated with ≥1 antiglaucoma medication and underwent ≥1 glaucoma-related procedure; CH4: patients who did not receive any antiglaucoma medications or undergo any glaucoma-related procedures.

b Includes general practitioner/family medicine/internal medicine, geriatrician; nurse practitioner/physician assistants.

c Excludes diabetes due to collinearity with CCI score category, hypertension due to collinearity with dyslipidemia.

d Assessed in 6-month pre-index period.

**Abbreviation:** CAD, carotid artery disease; CCI, Charlson comorbidity index; CH, cohort; CI, confidence interval; OR, odds ratio; ref., referent; SE, standard error.
